# Supplementary material
Source: bioRxiv or medRxiv preprint supplement (https://www.biorxiv.org/highwire/filestream/132632/field_highwire_adjunct_files/3/180406-4.pdf)
Supplement: Supplementary file [file 180406-4.pdf]

**Supplementary Table 1:** Bacterial strains present in microbial mock community HM-277D, BEI Resources.

| <b>Organism</b>                                         | <b>NCBI Reference Sequence</b> | <b>Number of operons</b> | <b>Concentration</b> |
|---------------------------------------------------------|--------------------------------|--------------------------|----------------------|
| <i>Acinetobacter baumannii</i> , strain 5377            | NC_009085                      | 100,000                  | 82 pg/ul             |
| <i>Actinomyces odontolyticus</i> , strain 1A.21         | NZ_AAYI02000000                | 10,000                   | 10 pg/ul             |
| <i>Bacillus cereus</i> , strain NRS 248                 | NC_003909                      | 1,000,000                | 450 pg/ul            |
| <i>Bacteroides vulgatus</i> , strain NCTC 11154         | NC_009614                      | 10,000                   | 7.6 pg/ul            |
| <i>Clostridium beijerinckii</i> , strain NCIMB 8052     | NC_009617                      | 1,000,000                | 440 pg/ul            |
| <i>Deinococcus radiodurans</i> , strain R1 (smooth)     | NC_001263                      | 10,000                   | 10 pg/ul             |
| <i>Enterococcus faecalis</i> , strain OG1RF             | NC_017316                      | 10,000,000               | 7 pg/ul              |
| <i>Escherichia coli</i> , strain K12, substrain MG1655  | NC_000913                      | 10,000,000               | 6.8 ng/ul            |
| <i>Helicobacter pylori</i> , strain 26695               | NC_000915                      | 100,000                  | 86 pg/ul             |
| <i>Lactobacillus gasseri</i> , strain 63 AM             | NC_008530                      | 100,000                  | 32 pg/ul             |
| <i>Listeria monocytogenes</i> , strain EGDe             | NC_003210                      | 100,000                  | 50 pg/ul             |
| <i>Neisseria meningitidis</i> , strain MC58             | NC_003112                      | 100,000                  | 58 pg/ul             |
| <i>Propionibacterium acnes</i> , strain KPA171202       | NC_006085                      | 100,000                  | 88 pg/ul             |
| <i>Pseudomonas aeruginosa</i> , strain PAO1-LAC         | NC_002516                      | 1,000,000                | 1.6 ng/ul            |
| <i>Rhodobacter sphaeroides</i> , strain ATH 2.4.1       | NC_007493                      | 10,000,000               | 14 ng/ul             |
| <i>Staphylococcus aureus</i> , strain TCH1516           | NC_010079                      | 1,000,000                | 590 pg/ul            |
| <i>Staphylococcus epidermidis</i> , FDA strain PCI 1200 | NC_004461                      | 10,000,000               | 5.1 ng/ul            |
| <i>Streptococcus agalactiae</i> , strain 2603 V/R       | NC_004116                      | 1,000,000                | 32 pg/ul             |
| <i>Streptococcus mutans</i> , strain UA159              | NC_004350                      | 10,000,000               | 4.1 ng/ul            |
| <i>Streptococcus pneumoniae</i> , strain TIGR4          | NC_003028                      | 10,000                   | 5.5 pg/ul            |
